# Supplementary material
Source: publisher figshare collection journal article supplement (https://sage.figshare.com/ndownloader/files/12461912)
Supplement: Supplementary file 1 [file 12461912]

**Supplemental Table S1**. Procedural descriptions for included ICD-9-CM codes.

| 8125: Carporadial fusion |
| --- |
| 8126: Metacarpocarpal fusion |
| 8127: Metacarpophalangeal fusion |
| 8128: Interphalangeal fusion |
| 82: Operation muscle tendon & fasc-hand |
| 8202: Myotomy of hand |
| 821: Division muscle tendon & fascia hand |
| 8211: Tenotomy of hand |
| 8232: Excision of tendon of hand graft |
| 8233: Other tenonectomy of hand |
| 8234: Excision muscle/fascia hand graft |
| 8236: Excision muscle/fascia hand graft |
| 824: Suture muscle tendon & fascia hand |
| 825: Transplantation muscle & tendon hand |
| 8251: Advancement of tendon of hand |
| 8252: Recession of tendon of hand |
| 8253: Reattachment of tendon of hand |
| 8254: Reattachment of muscle of hand |
| 8255: Other chg muscle/tendon length hand |
| 8256: Oth hand tendon transfer/tplnt |
| 8257: Other hand tendon transposition |
| 8258: Oth hand muscle transfer/tplnt |
| 8259: Other hand muscle transposition |
| 8271: Tendon pulley reconstruction hand |
| 8272: Plstc operation hnd w/gft musc/fasc |
| 8279: Plstc operation hnd w/oth gft/impl |
| 8285: Other tenodesis of hand |
| 8286: Other tenoplasty of hand |
| 8289: Other plastic operations on hand |
| 829: Oth OP Muscle tendon & fasc hand |
| 8291: Lysis of adhesions of hand |
| 83: OP Muscle tendon fasc & bursa no hand |
| 8341: Excision of tendon for graft |
| 8343: Excision of muscle or fascia graft |
| 8364: Other suture of tendon |
| 837: Reconstruction of muscle and tendon |
| 8371: Advancement of tendon |
| 8372: Recession of tendon |
| 8373: Reattachment of tendon |
| 8374: Reattachment of muscle |
| 8375: Tendon transfer or transplantation |
| 8376: Other tendon transposition |
| 8377: Muscle transfer or transplantation |
| 838: Oth plastic op muscle tendon & fasc |
| 8381: Tendon graft |
| 8388: Other plastic operations on tendon |
